# Supplementary material for: A self-sacrifice template route to iodine modified BiOIO3: band gap engineering and highly boosted visible-light active photoreactivity
Source: Royal Society of Chemistry journal article supplement (doi:10.1039/c5cp06685a), 2016-01-01
Supplement: c5cp06685a1.pdf [file c5cp06685a1.pdf]

*Electronic Supplementary Information for*

**A Self-sacrifice Template Route to Iodine Modified BiOIO<sub>3</sub>:  
Band Gap Engineering and Highly Boosted Visible-Light  
Active Photoreactivity**

Jingwen Feng,<sup>a</sup> Hongwei Huang,<sup>\*a</sup> Shixin Yu,<sup>a</sup> Fan Dong,<sup>b</sup> Yihe Zhang<sup>\*a</sup>

*<sup>a</sup>Beijing Key Laboratory of Materials Utilization of Nonmetallic Minerals and Solid Wastes, National Laboratory of Mineral Materials, School of Materials Science and Technology, China University of Geosciences, Beijing 100083, China*

*<sup>b</sup>Chongqing Key Laboratory of Catalysis and Functional Organic Molecules, College of Environmental and Bio-logical Engineering, Chongqing Technology and Business University, Chongqing, 400067, China*

\*Corresponding author. Tel.: +86-10-82322247.

*E-mail address: [hhw@cugb.edu.cn](mailto:hhw@cugb.edu.cn) (H. W. Huang); [zyh@cugb.edu.cn](mailto:zyh@cugb.edu.cn) (Y. H. Zhang)*

**Table S1.** The adsorption data of RhB and MO in darkness.

| <b>Samples</b>         |            | <b>BiOIO<sub>3</sub></b> | <b>IB-1</b>   | <b>IB-2</b>   | <b>IB-3</b>   | <b>IB-4</b>   |
|------------------------|------------|--------------------------|---------------|---------------|---------------|---------------|
| <b>c/c<sub>0</sub></b> | <b>RhB</b> | <b>97.23%</b>            | <b>96.65%</b> | <b>98.43%</b> | <b>93.38%</b> | <b>94.55%</b> |
| <b>c/c<sub>0</sub></b> | <b>MO</b>  | <b>98.06%</b>            | <b>97.28%</b> | <b>96.34%</b> | <b>96.58%</b> | <b>98.54%</b> |

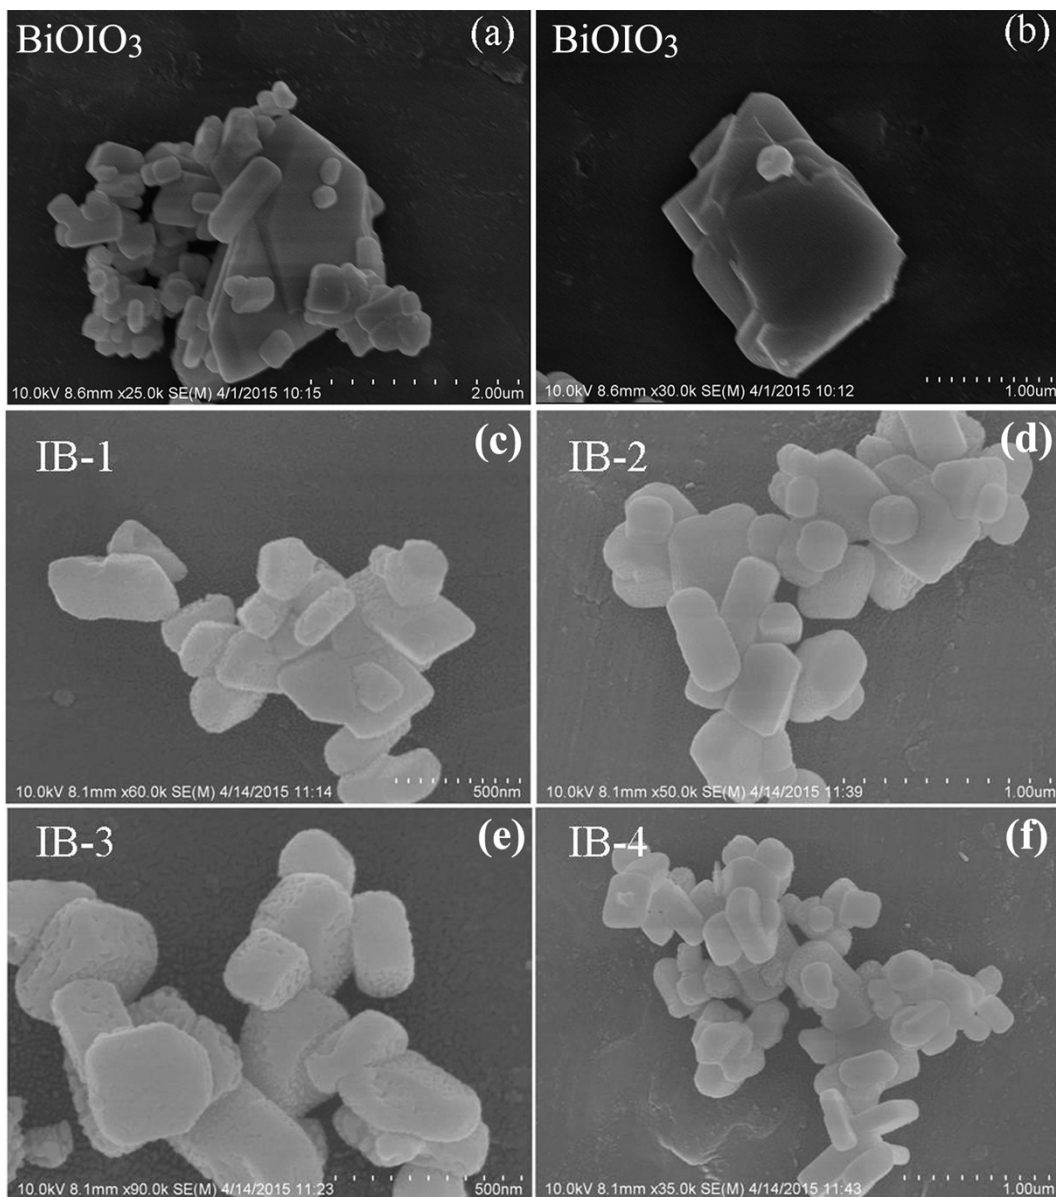

**Figure S1.** SEM images of (a, b) BiOI, (c) IB-1, (d) IB-2, (e) IB-3 and (f) IB-4.

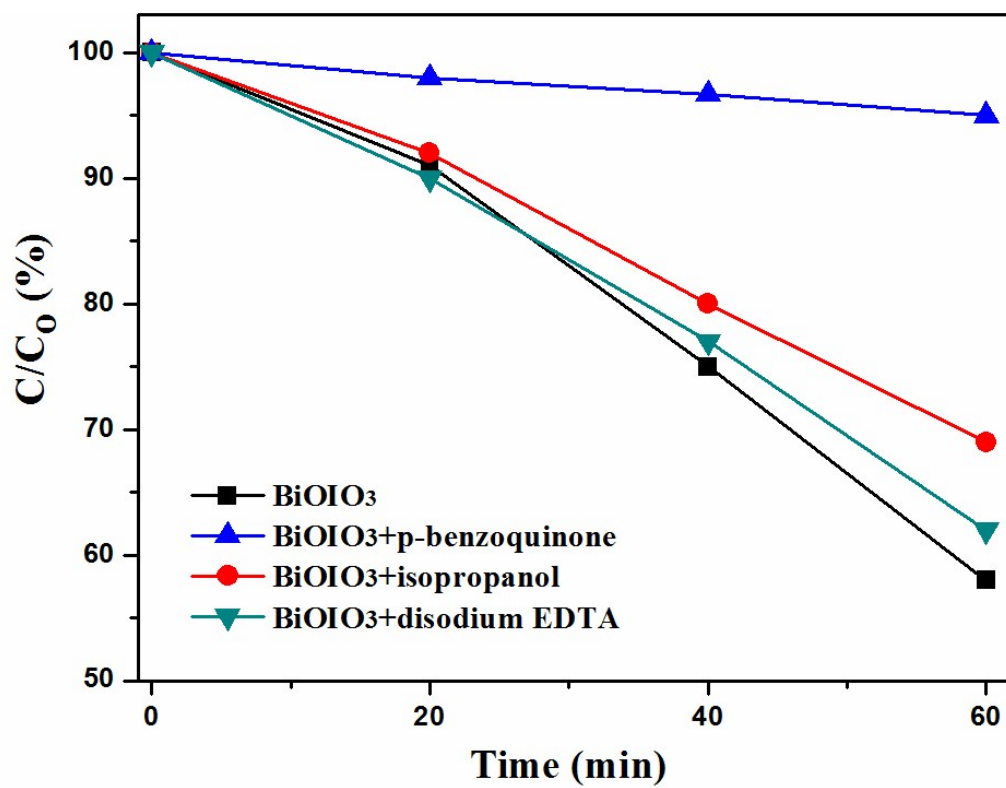

**Figure S2.** Photodegradation of RhB over BiOI<sub>3</sub> in the presence of different scavengers under visible light ( $\lambda > 420$  nm).
